## Correction: The combination of early treatment response and ypT stage is a novel metric to stage rectal cancer patients treated with neoadjuvant chemoradiotherapy

Jian Cui<sup>1</sup>, Lin Yang<sup>2</sup>, Lei Guo<sup>2</sup>, Yongfu Shao<sup>1</sup>, Dongfeng Tan<sup>3</sup>, Ni Li<sup>4</sup> and Haizeng Zhang<sup>1</sup>

<sup>1</sup> Department of Colorectal Surgery, National Cancer Center/Cancer Hospital, Chinese Academy of Medical Sciences and Peking Union Medical College, Beijing, China

<sup>2</sup> Department of Pathology, National Cancer Center/Cancer Hospital, Chinese Academy of Medical Sciences and Peking Union Medical College, Beijing, China

<sup>3</sup> Department of Pathology and Laboratory Medicine, The University of Texas M. D. Anderson Cancer Center, Houston, TX, USA

<sup>4</sup> National Office for Cancer Prevention and Control, National Cancer Center/Cancer Hospital, Chinese Academy of Medical Sciences and Peking Union Medical College, Beijing, China

**Published:** February 19, 2019

**Copyright:** Cui et al. This is an open-access article distributed under the terms of the Creative Commons Attribution License 3.0 (CC BY 3.0), which permits unrestricted use, distribution, and reproduction in any medium, provided the original author and source are credited.

**This article has been corrected:** The correct author and affiliation information is given below:

Jian Cui<sup>1</sup>, Lin Yang<sup>2</sup>, Lei Guo<sup>2</sup>, Yongfu Shao<sup>1</sup>, Dongfeng Tan<sup>3</sup>, Ni Li<sup>4</sup> and Haizeng Zhang<sup>1</sup>

<sup>1</sup> Department of Colorectal Surgery, National Cancer Center/Cancer Hospital, Chinese Academy of Medical Sciences and Peking Union Medical College, Beijing, China

<sup>2</sup> Department of Pathology, National Cancer Center/Cancer Hospital, Chinese Academy of Medical Sciences and Peking Union Medical College, Beijing, China

<sup>3</sup> Department of Pathology and Laboratory Medicine, The University of Texas M. D. Anderson Cancer Center, Houston, TX, USA

<sup>4</sup> National Office for Cancer Prevention and Control, National Cancer Center/Cancer Hospital, Chinese Academy of Medical Sciences and Peking Union Medical College, Beijing, China

Original article: Oncotarget. 2017; 8:37845-37854. <https://doi.org/10.18632/oncotarget.14708>
